# Supplementary material for: Assembly of the Murine Leukemia Virus Is Directed towards Sites of Cell–Cell Contact
Source: PubMed Central journal article supplement (PMC2709449; doi:10.1371/journal.pbio.1000163), 2009-07-28
Supplement: pbio.1000163.s004.pdf [file pbio.1000163.s004.pdf]

Table S1. Calculation of Enhancement of MLV Assembly at Cell-Cell Contact Sites in Movie 3.

| Frame | Contact                      |                                 | Non-contact                  |                                 |
|-------|------------------------------|---------------------------------|------------------------------|---------------------------------|
|       | Assembly Events <sup>#</sup> | Surface Area( $\mu\text{m}^2$ ) | Assembly Events <sup>#</sup> | Surface Area( $\mu\text{m}^2$ ) |
| 1     | 1                            | 112.63                          | 1                            | 1029.919892                     |
| 3     | 0                            | 147.4897                        | 1                            | 982.789455                      |
| 6     | 1                            | 160.0843                        | 1                            | 971.832762                      |
| 9     | 2                            | 171.1891                        | 0                            | 1040.349109                     |
| 10    | 1                            | 139.7071                        | 0                            | 983.1040898                     |
| 11    | 1                            | 124.7527                        | 1                            | 1010.421791                     |
| 14    | 1                            | 107.42                          | 0                            | 985.7969932                     |
| 16    | 1                            | 110.1869                        | 0                            | 996.068893                      |
| 17    | 2                            | 134.4323                        | 0                            | 993.1076246                     |
| 19    | 2                            | 115.5172                        | 0                            | 979.6431074                     |
| 21    | 2                            | 106.1337                        | 0                            | 1003.832969                     |
| 22    | 1                            | 95.8433                         | 0                            | 997.5587811                     |
| 23    | 1                            | 120.5606                        | 0                            | 995.9485914                     |
| 25    | 1                            | 101.1736                        | 0                            | 1003.314747                     |
| 26    | 0                            | 109.6965                        | 1                            | 949.3641381                     |
| 28    | 1                            | 104.8937                        | 0                            | 1000.464526                     |
| 29    | 1                            | 105.4582                        | 0                            | 1010.847473                     |
| 30    | 1                            | 98.26784                        | 0                            | 1016.686724                     |
| 32    | 2                            | 87.60727                        | 0                            | 1017.343756                     |
| 35    | 1                            | 113.9626                        | 0                            | 989.6188803                     |
| 36    | 1                            | 104.2737                        | 0                            | 938.8423813                     |
| 38    | 1                            | 84.2851                         | 0                            | 1013.383059                     |
| 40    | 4                            | 82.62864                        | 0                            | 974.4979035                     |
| 41    | 0                            | 71.28328                        | 2                            | 960.3208311                     |
| 42    | 2                            | 71.2185                         | 0                            | 945.6903145                     |
| 43    | 1                            | 75.94728                        | 0                            | 971.7772382                     |
| 46    | 1                            | 61.83499                        | 0                            | 966.71532                       |
| 53    | 1                            | 69.40473                        | 0                            | 971.7957461                     |
| 57    | 2                            | 87.4222                         | 0                            | 937.6301121                     |
| 58    | 1                            | 76.12311                        | 0                            | 944.8574577                     |
| 59    | 1                            | 83.28567                        | 0                            | 952.2051049                     |
| 61    | 0                            | 70.82984                        | 1                            | 942.0812686                     |
| 62    | 1                            | 92.49337                        | 0                            | 984.6402478                     |
| 69    | 2                            | 71.11671                        | 0                            | 935.7978273                     |
| 73    | 1                            | 68.50709                        | 0                            | 922.9995954                     |
| 74    | 1                            | 58.15191                        | 0                            | 985.3157871                     |
| 76    | 1                            | 50.5359                         | 0                            | 876.3226024                     |

|                         | Total Assembly<br>Events <sup>#</sup> | Average Surface<br>Area( $\mu\text{m}^2$ ) | Total Assembly<br>Events <sup>#</sup> | Average Surface<br>Area( $\mu\text{m}^2$ ) |
|-------------------------|---------------------------------------|--------------------------------------------|---------------------------------------|--------------------------------------------|
| 37 Event Frames         | 44                                    | 98.54996                                   | 8                                     | 977.9158675                                |
| Events/ $\mu\text{m}^2$ | 0.446474                              |                                            | 0.008181                              |                                            |
| Fold of<br>Enhancement* | 54.57676                              |                                            |                                       |                                            |
| Overlay Frames          | Total Assembly<br>Events <sup>#</sup> | Surface Area( $\mu\text{m}^2$ )            | Total Assembly<br>Events <sup>#</sup> | Surface Area( $\mu\text{m}^2$ )            |
| 1-157                   | 44                                    | 294.0262                                   | 8                                     | 784.3289491                                |
| Events/ $\mu\text{m}^2$ | 0.149647                              |                                            | 0.010199802                           |                                            |
| Fold of<br>Enhancement* | 14.67151355                           |                                            |                                       |                                            |

<sup>#</sup> *de novo* assembled particle numbers; \* Ratio of *de novo* assembled particle numbers per unit surface area in contacting region to the one in non-contacting region.
