# Supplementary material for: Assembly of the Murine Leukemia Virus Is Directed towards Sites of Cell–Cell Contact
Source: PubMed Central journal article supplement (PMC2709449; doi:10.1371/journal.pbio.1000163), 2009-07-28
Supplement: pbio.1000163.s005.pdf [file pbio.1000163.s005.pdf]

Table S2. Calculation of Enhancement of MLV Assembly at Cell-Cell Contact Sites.

|                                                 |                |                    |                                                 |                               |                |                    |  |
|-------------------------------------------------|----------------|--------------------|-------------------------------------------------|-------------------------------|----------------|--------------------|--|
| <b>HEK293-XCmCAT1-CFP</b>                       |                | <b>A</b>           |                                                 | <b>B</b>                      |                | <b>C</b>           |  |
| <b>Time Lapse Video</b>                         | <b>Contact</b> | <b>Non-contact</b> | <b>Contact</b>                                  | <b>Non-contact</b>            | <b>Contact</b> | <b>Non-contact</b> |  |
| <b>Total Imaging Time (min)</b>                 |                | 150                |                                                 | 150                           |                | 171                |  |
| <b>Frame Time (sec)</b>                         |                | 60                 |                                                 | 60                            |                | 99                 |  |
| <b>Surface Area(<math>\mu\text{m}^2</math>)</b> | 294.0262       | 784.3289           | 272.1221                                        | 476.5329                      | 239.7239       | 1317.357           |  |
| <b>Assembly Events<sup>#</sup></b>              | 44             | 8                  | 51                                              | 9                             | 21             | 10                 |  |
| <b>Events/<math>\mu\text{m}^2</math></b>        | 0.149647       | 0.0102             | 0.187416                                        | 0.018886                      | 0.087601       | 0.007591           |  |
| <b>Fold of Enhancement*</b>                     |                | <b>14.67</b>       |                                                 | <b>9.92</b>                   |                | <b>11.54</b>       |  |
| <b>HEK293-XCmCAT1-CFP</b>                       |                | <b>D</b>           |                                                 | <b>E</b>                      |                | <b>F</b>           |  |
| <b>Time Lapse Video</b>                         | <b>Contact</b> | <b>Non-contact</b> | <b>Contact</b>                                  | <b>Non-contact</b>            | <b>Contact</b> | <b>Non-contact</b> |  |
| <b>Total Imaging Time (min)</b>                 |                | 108                |                                                 | 127                           |                | 120                |  |
| <b>Frame Time (sec)</b>                         |                | 52                 |                                                 | 56                            |                | 68                 |  |
| <b>Surface Area(<math>\mu\text{m}^2</math>)</b> | 310.8221       | 1383.736           | 188.1979                                        | 735.4403                      | 520.3689       | 1022.221           |  |
| <b>Assembly Events<sup>#</sup></b>              | 16             | 5                  | 18                                              | 9                             | 51             | 16                 |  |
| <b>Events/<math>\mu\text{m}^2</math></b>        | 0.051476       | 0.003613           | 0.095644                                        | 0.012238                      | 0.098007       | 0.015652           |  |
| <b>Fold of Enhancement*</b>                     |                | <b>14.25</b>       |                                                 | <b>7.82</b>                   |                | <b>6.26</b>        |  |
| <b>HEK293-XCmCAT1-CFP</b>                       |                | <b>G</b>           |                                                 | <b>H</b>                      |                | <b>I</b>           |  |
| <b>Time Lapse Video</b>                         | <b>Contact</b> | <b>Non-contact</b> | <b>Contact</b>                                  | <b>Non-contact</b>            | <b>Contact</b> | <b>Non-contact</b> |  |
| <b>Total Imaging Time (min)</b>                 |                | 141                |                                                 | 143                           |                | 126                |  |
| <b>Frame Time (sec)</b>                         |                | 65                 |                                                 | 47                            |                | 54                 |  |
| <b>Surface Area(<math>\mu\text{m}^2</math>)</b> | 212.1286       | 1622.905           | 149.3312                                        | 644.2702                      | 145.5834       | 820.6415           |  |
| <b>Assembly Events<sup>#</sup></b>              | 16             | 14                 | 53                                              | 33                            | 38             | 12                 |  |
| <b>Events/<math>\mu\text{m}^2</math></b>        | 0.075426       | 0.008627           | 0.354916                                        | 0.051221                      | 0.261019       | 0.014623           |  |
| <b>Fold of Enhancement*</b>                     |                | <b>8.74</b>        |                                                 | <b>6.93</b>                   |                | <b>17.85</b>       |  |
| <b>HEK293-XClifeAct-CFP</b>                     |                | <b>J</b>           |                                                 | <b>HEK293-HEK293mCAT1-CFP</b> |                | <b>K</b>           |  |
| <b>Time Lapse Video</b>                         | <b>Contact</b> | <b>Non-contact</b> | <b>Time Lapse Video</b>                         |                               | <b>Contact</b> | <b>Non-contact</b> |  |
| <b>Total Imaging Time (min)</b>                 |                | 83                 | <b>Total Imaging Time (min)</b>                 |                               |                | 141                |  |
| <b>Frame Time (sec)</b>                         |                | 95                 | <b>Frame Time (sec)</b>                         |                               |                | 54                 |  |
| <b>Surface Area(<math>\mu\text{m}^2</math>)</b> | 322.5626       | 985.5138           | <b>Surface Area(<math>\mu\text{m}^2</math>)</b> |                               | 261.4893       | 1240.077           |  |
| <b>Assembly Events<sup>#</sup></b>              | 42             | 18                 | <b>Assembly Events<sup>#</sup></b>              |                               | 36             | 26                 |  |
| <b>Events/<math>\mu\text{m}^2</math></b>        | 0.130207       | 0.018265           | <b>Events/<math>\mu\text{m}^2</math></b>        |                               | 0.137673       | 0.020966           |  |
| <b>Fold of Enhancement*</b>                     |                | <b>7.1</b>         | <b>Fold of Enhancement*</b>                     |                               |                | <b>6.6</b>         |  |
| <b>Cos-XCmCAT1-CFP</b>                          |                | <b>L</b>           |                                                 | <b>M</b>                      |                | <b>N</b>           |  |
| <b>Time Lapse Video</b>                         | <b>Contact</b> | <b>Non-contact</b> | <b>Contact</b>                                  | <b>Non-contact</b>            | <b>Contact</b> | <b>Non-contact</b> |  |
| <b>Total Imaging Time (min)</b>                 |                | 110                |                                                 | 203                           |                | 332                |  |
| <b>Frame Time (sec)</b>                         |                | 44                 |                                                 | 82                            |                | 132                |  |
| <b>Surface Area(<math>\mu\text{m}^2</math>)</b> | 686.0865       | 3821.105           | 557.5471                                        | 2403.056                      | 559.37         | 3052.409           |  |
| <b>Assembly Events<sup>#</sup></b>              | 18             | 5                  | 14                                              | 7                             | 12             | 1                  |  |
| <b>Events/<math>\mu\text{m}^2</math></b>        | 0.026236       | 0.001309           | 0.02511                                         | 0.002913                      | 0.021453       | 0.000328           |  |
| <b>Fold of Enhancement*</b>                     |                | <b>20.05</b>       |                                                 | <b>8.62</b>                   |                | <b>65.48</b>       |  |

<sup>#</sup> *de novo* assembled particle numbers; \* Ratio of *de novo* assembled particle numbers per unit surface area in contacting region to the one in non-contacting region.
