# Supplementary material for: Assembly of the Murine Leukemia Virus Is Directed towards Sites of Cell–Cell Contact
Source: PubMed Central journal article supplement (PMC2709449; doi:10.1371/journal.pbio.1000163), 2009-07-28
Supplement: pbio.1000163.s006.pdf [file pbio.1000163.s006.pdf]

Table S3. Calculation of Enhancement of MLV Assembly at Cell-Cell Contact Sites for Wild Type Env and Mutant Env Lacking the Cytoplasmic Tail.

| HEK293-XC                    |             | Env $\Delta$ H8             |              |             |              |             |              |             |  |
|------------------------------|-------------|-----------------------------|--------------|-------------|--------------|-------------|--------------|-------------|--|
| Time Lapse Video             | a           |                             | b            |             | c            |             | d            |             |  |
|                              | Contact     | Non-contact                 | Contact      | Non-contact | Contact      | Non-contact | Contact      | Non-contact |  |
| Total Imaging Time (min)     | 105         |                             | 114          |             | 114          |             | 105          |             |  |
| Frame Time (sec)             | 64          |                             | 66           |             | 66           |             | 64           |             |  |
| S( $\mu\text{m}^2$ )         | 94.50148    | 778.7766                    | 203.0538     | 556.3281    | 353.3256     | 1201.007    | 44.44679     | 937.0749    |  |
| Assembly Events <sup>#</sup> | 15          | 16                          | 53           | 5           | 38           | 3           | 7            | 8           |  |
| Events/ $\mu\text{m}^2$      | 0.158728    | 0.020545                    | 0.261015     | 0.008988    | 0.10755      | 0.002498    | 0.157492     | 0.008537    |  |
| Fold of Enhancement*         | <b>7.73</b> |                             | <b>29.04</b> |             | <b>43.06</b> |             | <b>18.45</b> |             |  |
| HEK293-XC                    |             | Env $\Delta$ H8 $\Delta$ CT |              |             |              |             |              |             |  |
| Time Lapse Video             | e           |                             | f            |             | g            |             | h            |             |  |
|                              | Contact     | Non-contact                 | Contact      | Non-contact | Contact      | Non-contact | Contact      | Non-contact |  |
| Total Imaging Time (min)     | 71          |                             | 74           |             | 92           |             | 114          |             |  |
| Frame Time (sec)             | 77          |                             | 53           |             | 65           |             | 65           |             |  |
| S( $\mu\text{m}^2$ )         | 252.3834    | 959.451                     | 122.6243     | 771.3919    | 15.2968      | 767.1999    | 126.9829     | 622.2828    |  |
| Particle Number <sup>#</sup> | 3           | 54                          | 5            | 26          | 1            | 43          | 1            | 13          |  |
| Particle/ $\mu\text{m}^2$    | 0.011887    | 0.056282                    | 0.040775     | 0.033705    | 0.065373     | 0.056048    | 0.007875     | 0.020891    |  |
| Fold of Enhancement*         | <b>0.21</b> |                             | <b>1.21</b>  |             | <b>1.17</b>  |             | <b>0.38</b>  |             |  |

<sup>#</sup> *de novo* assembled particle numbers; \* Ratio of *de novo* assembled particle numbers per unit surface in contacting region to the one in non-contacting region.
